# Supplementary material for: Increased Accuracy of Genomic Prediction Using Preselected SNPs from GWAS with Imputed Whole-Genome Sequence Data in Pigs
Source: MDPI journal article supplement (doi:10.3390/ani13243871), 2023-12-15
Supplement: s1 [file s1]

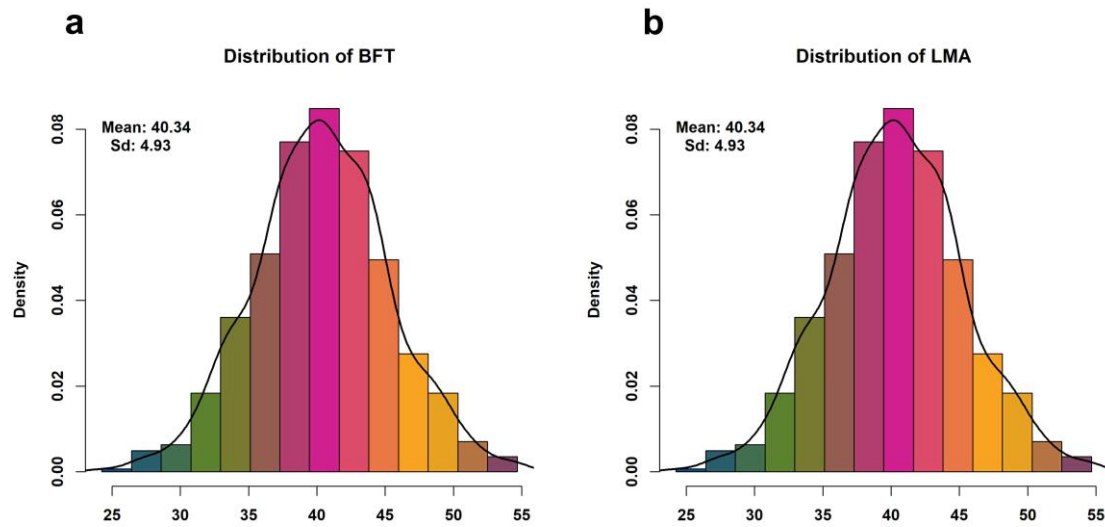

**Figure S1:** Corrected phenotypic distribution of 651 Yorkshire pigs. (a) Phenotypic distribution of backfat thickness (BFT) trait and (b) Phenotypic distribution of loin muscle area (LMA) trait;

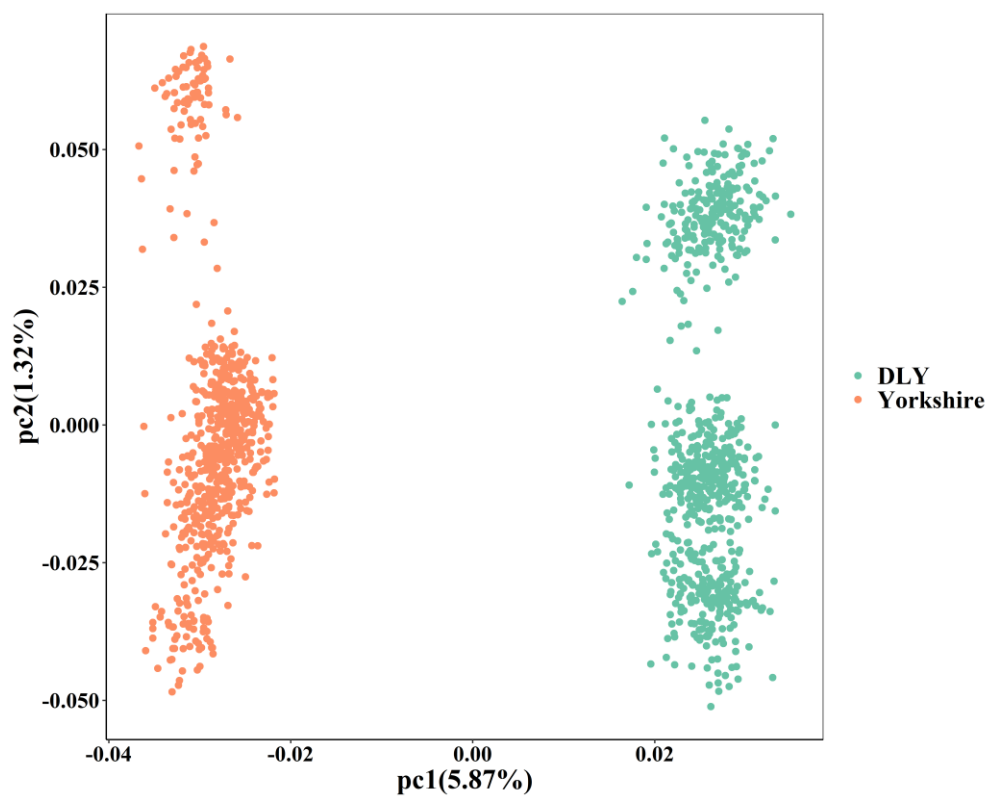

**Figure S2:** Genetic structure of two populations (DLY and Yorkshire pigs), scatter plots of the first two principal components of genotype matrix for SNPs
